# Supplementary material
Source: bioRxiv or medRxiv preprint supplement (https://medrxiv.org/highwire/filestream/72690/field_highwire_adjunct_files/1/2020.02.24.20026682-2.pdf)

### Coronavirus

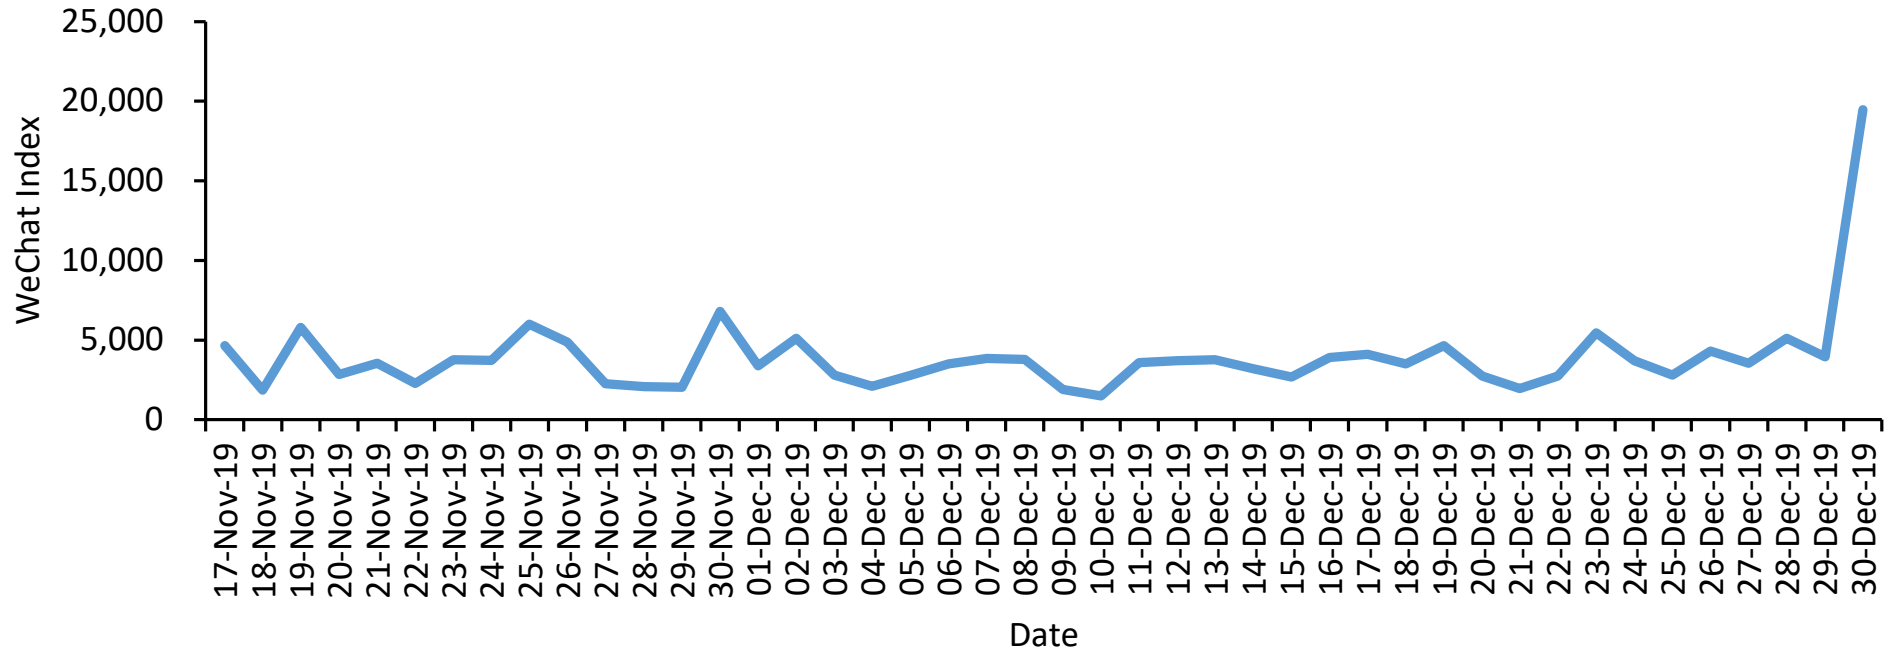

### Novel coronavirus

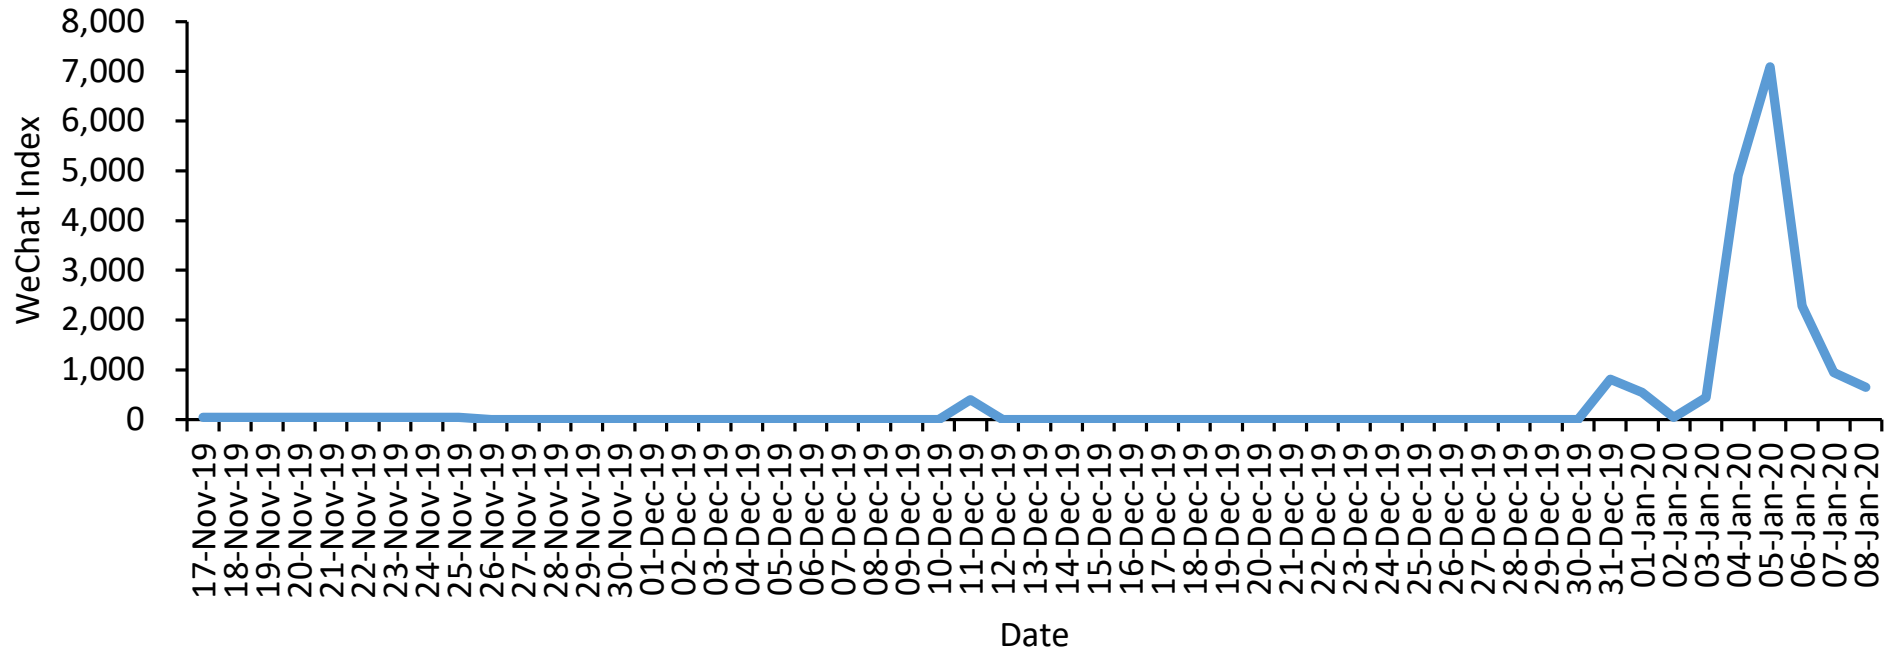

### Pneumonia

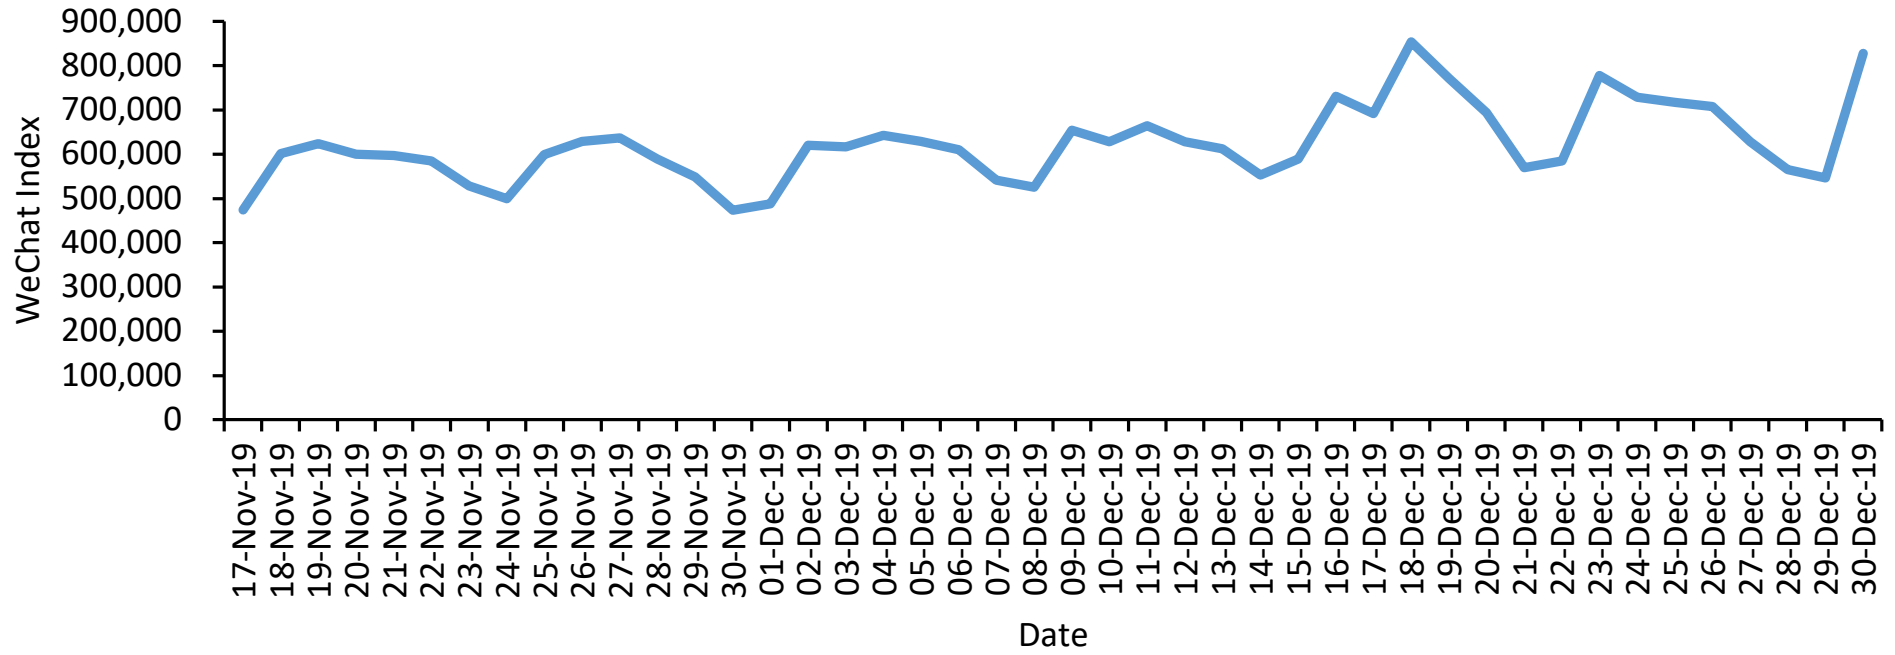

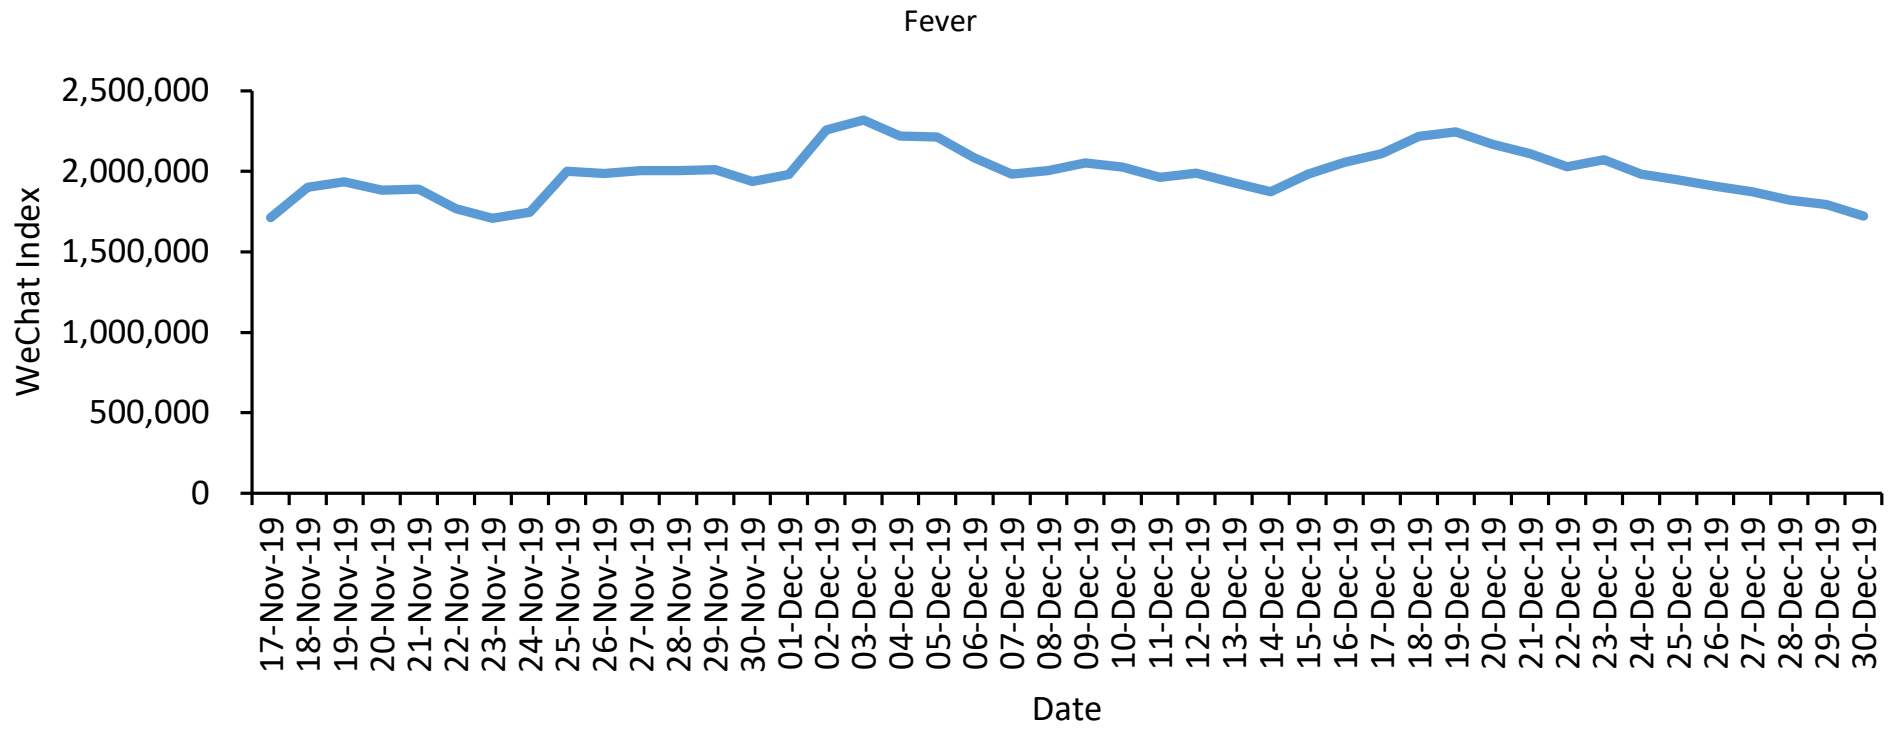

### Cough

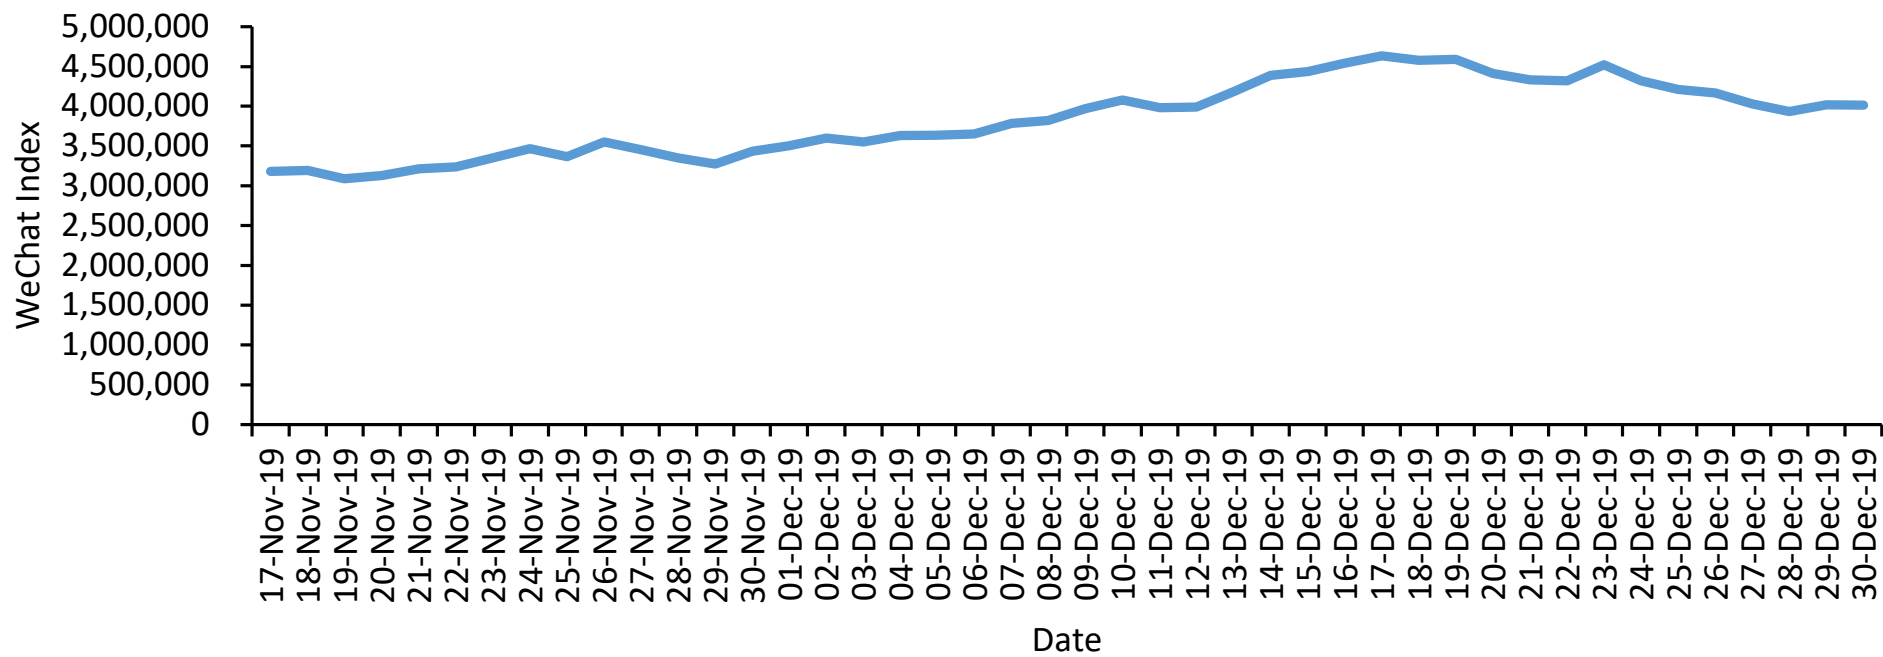

### Shortness of breath

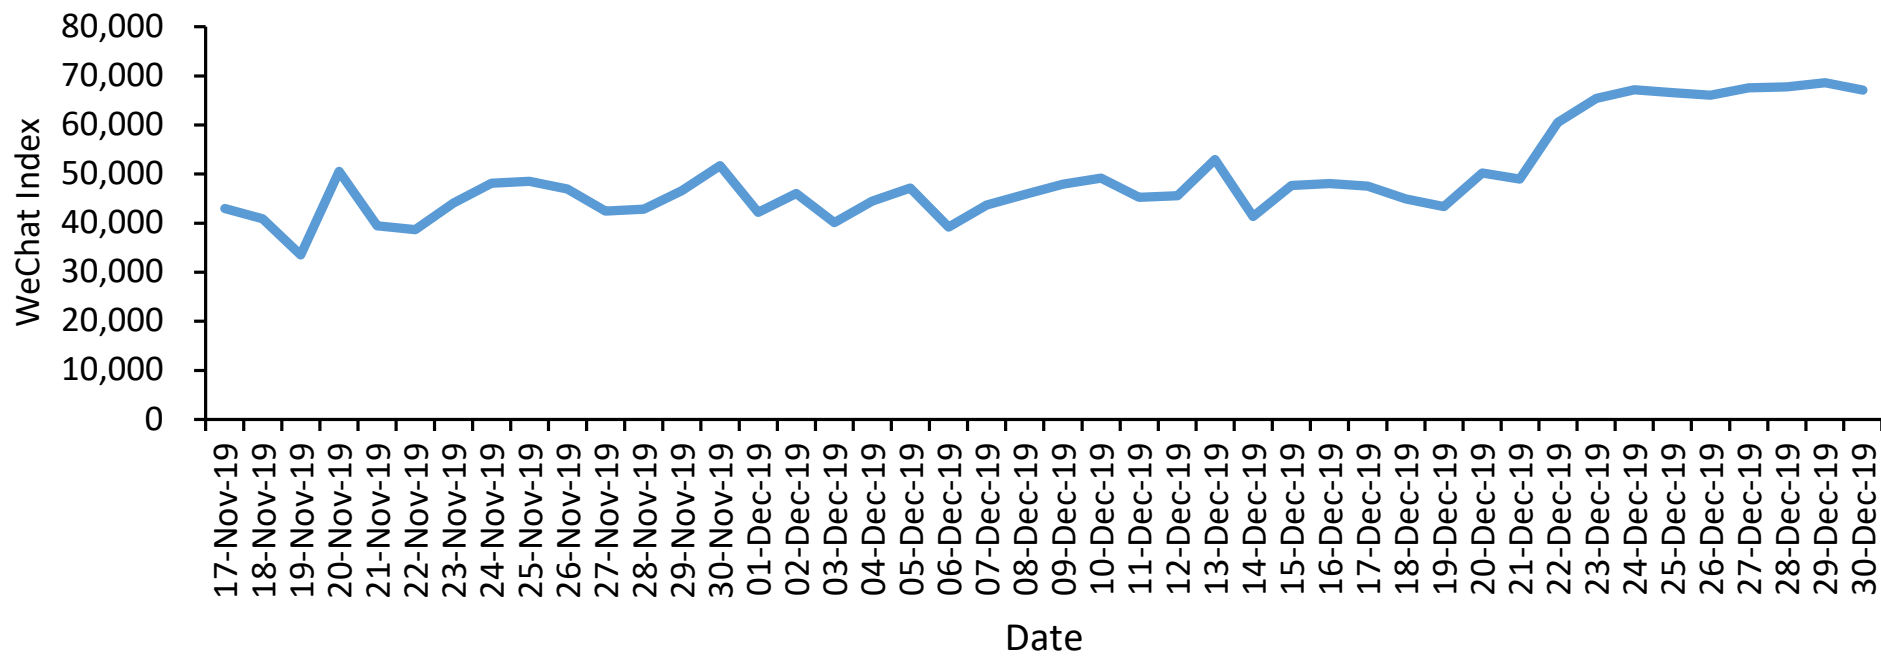

# Dyspnea

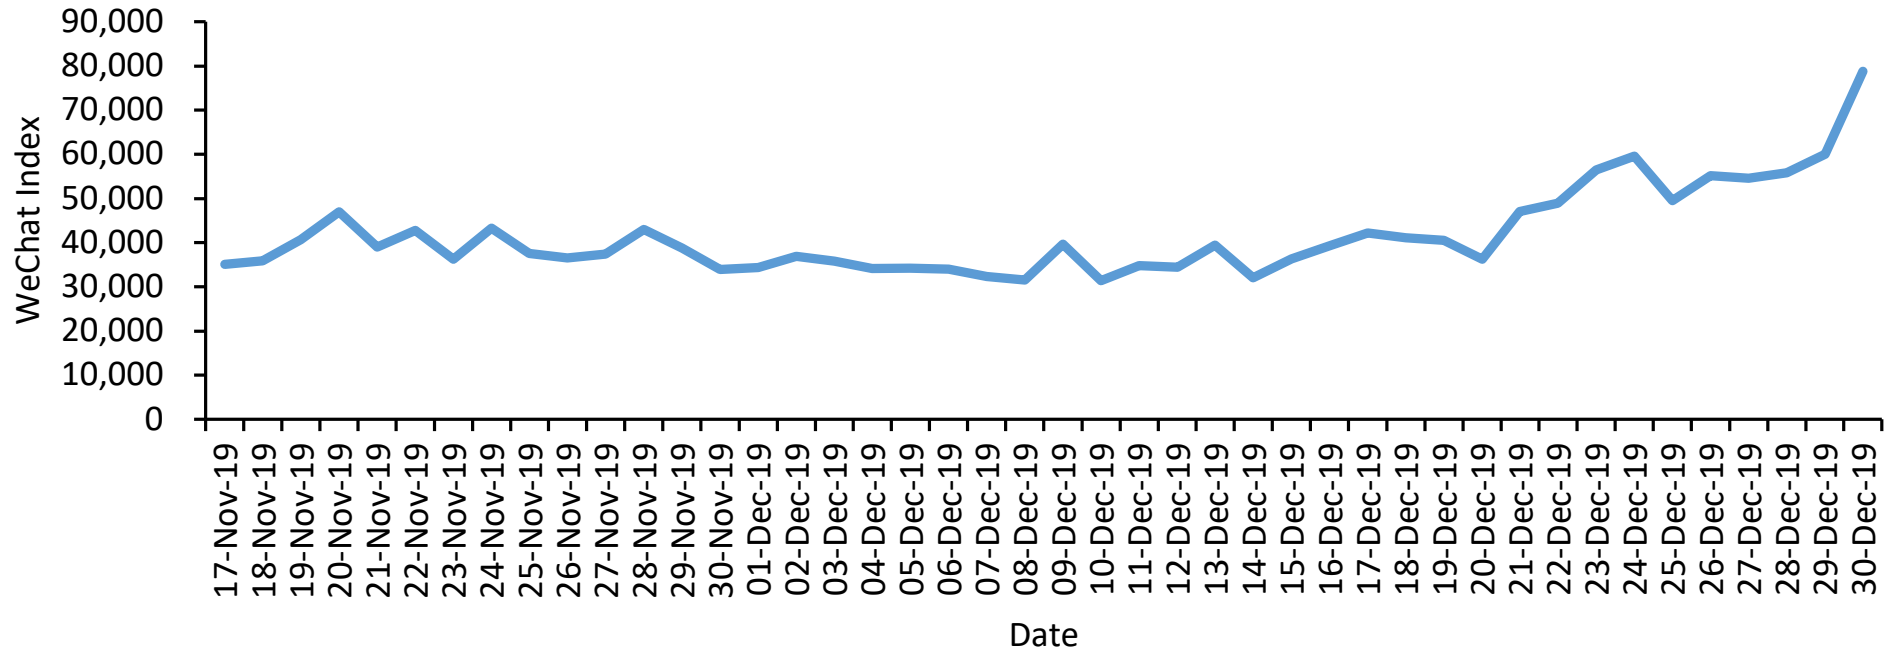

### Stuffy nose

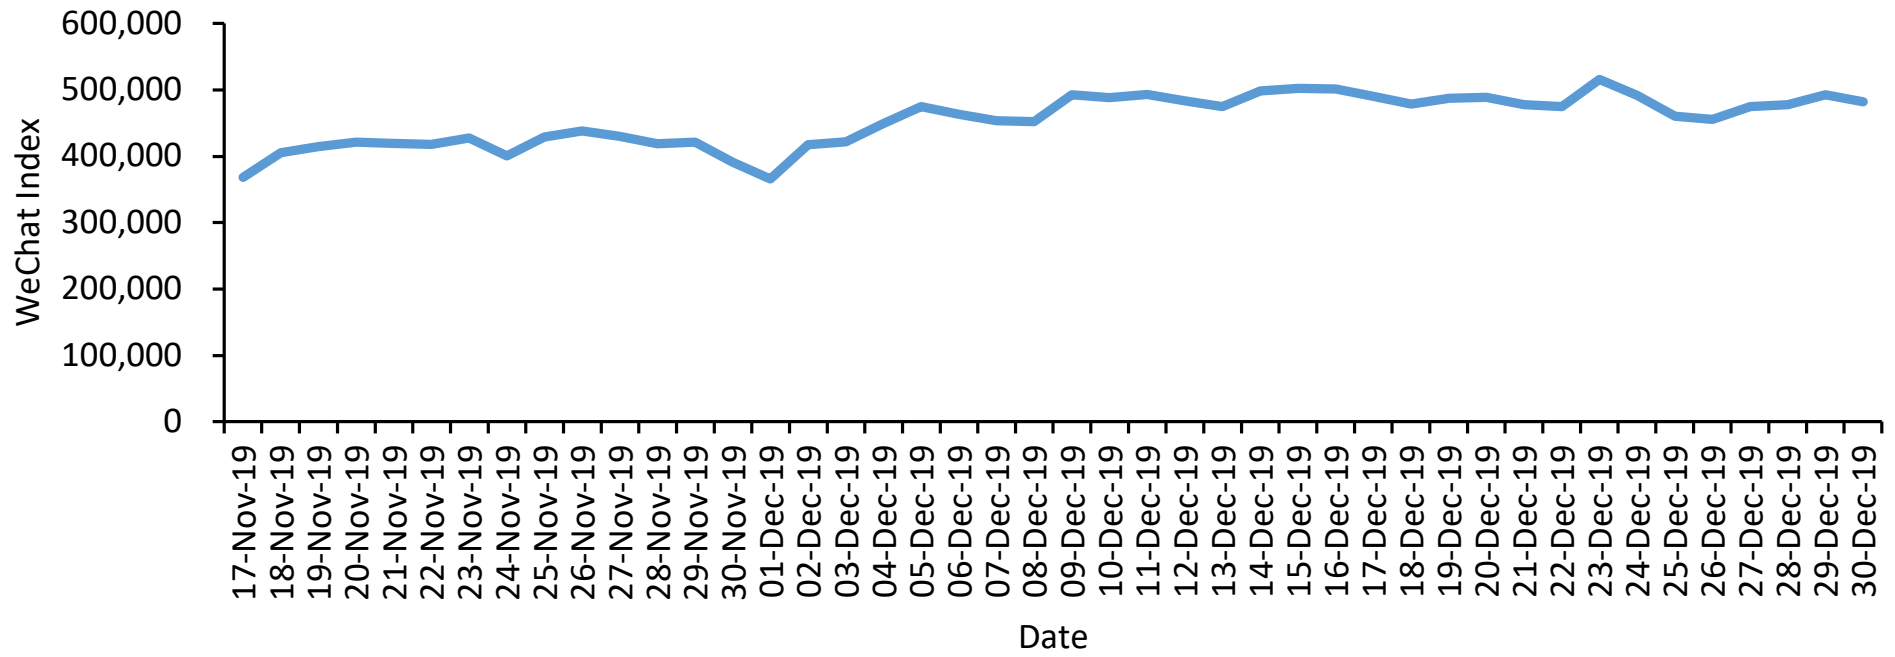



### Runny nose

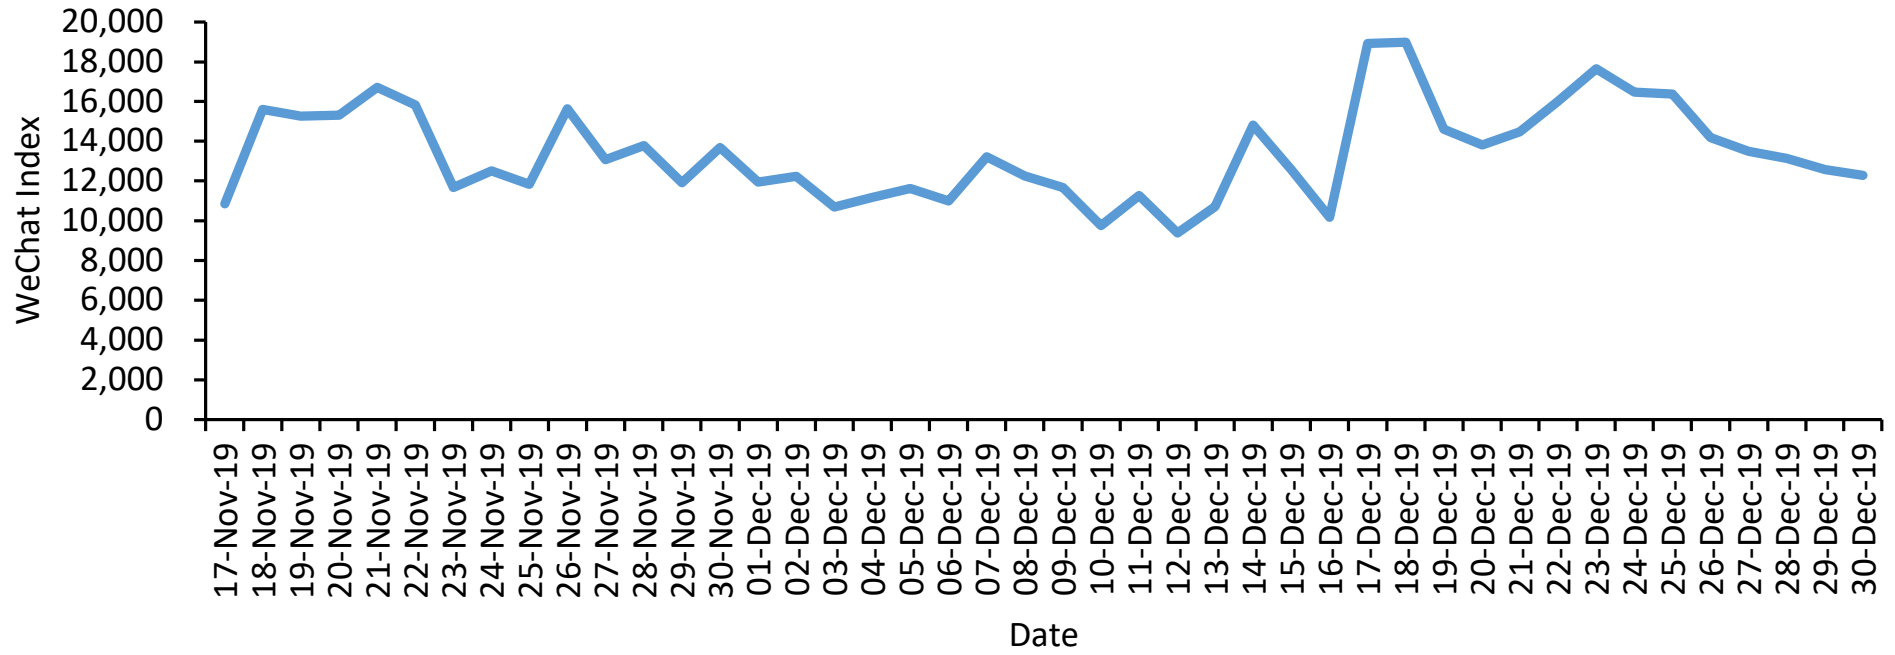

# Fatigue

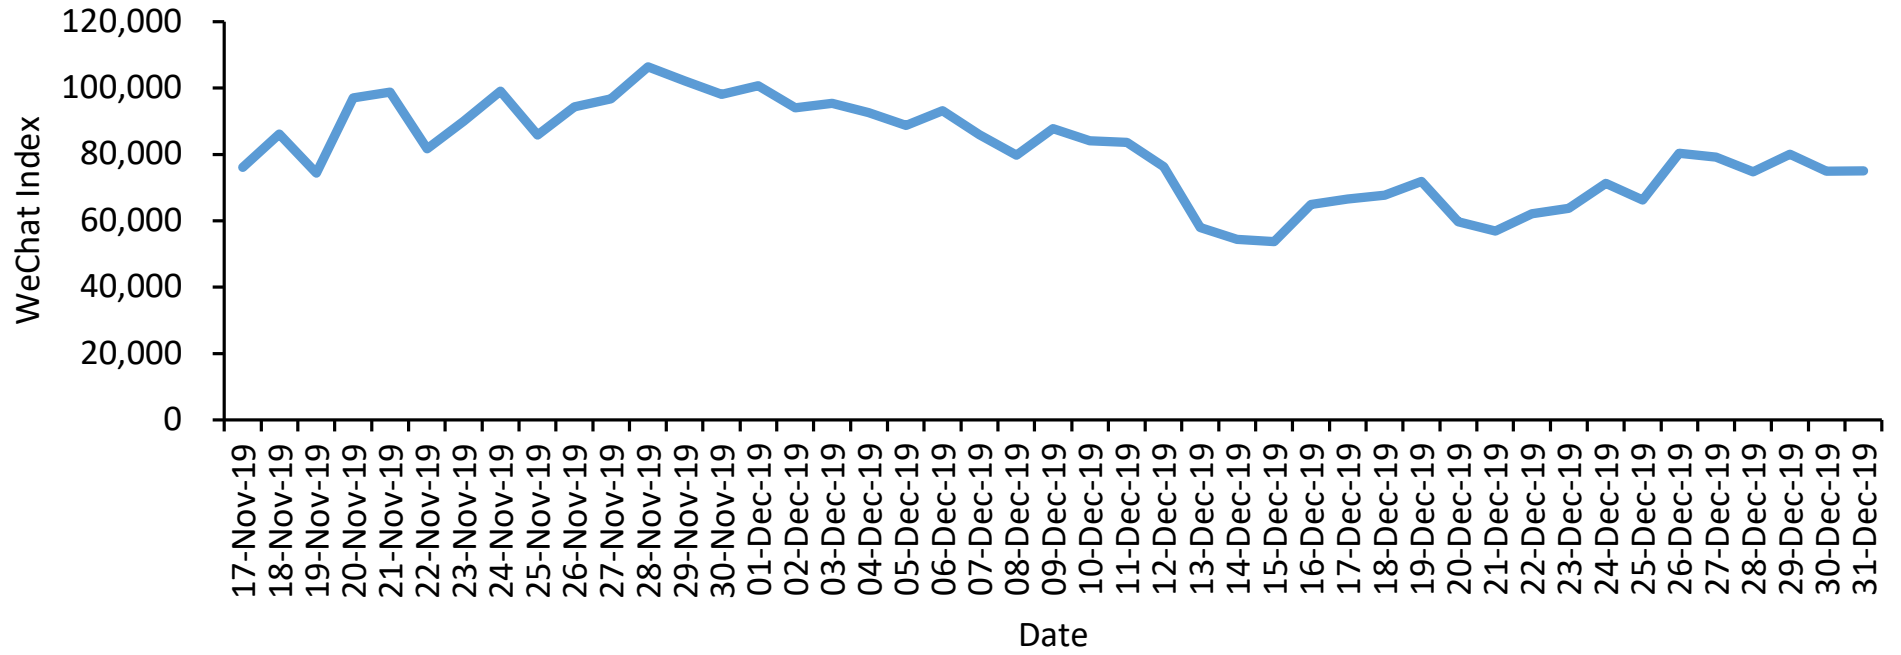

### Diarrhea

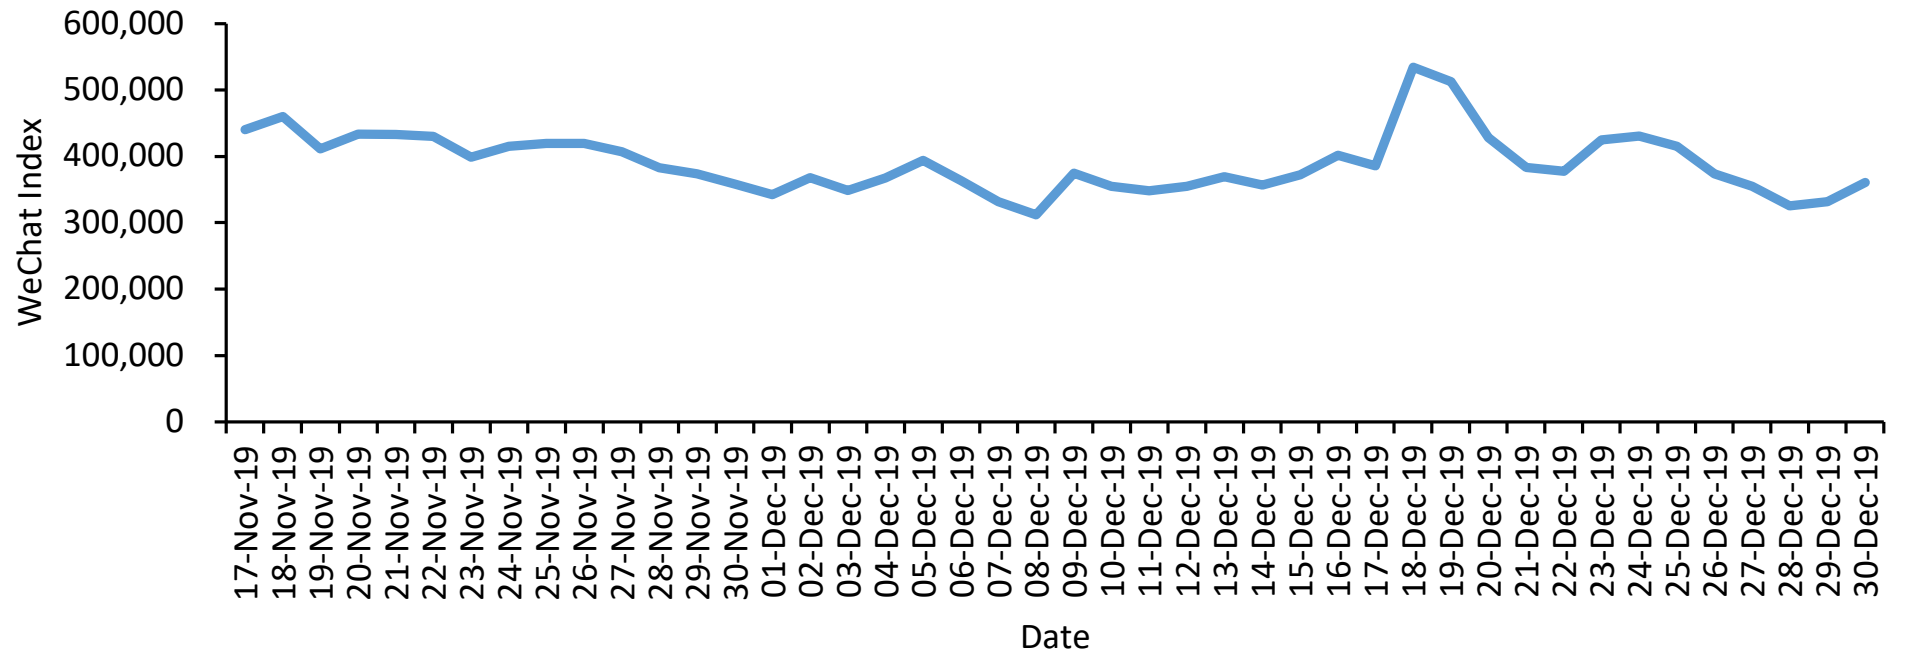

### Infection

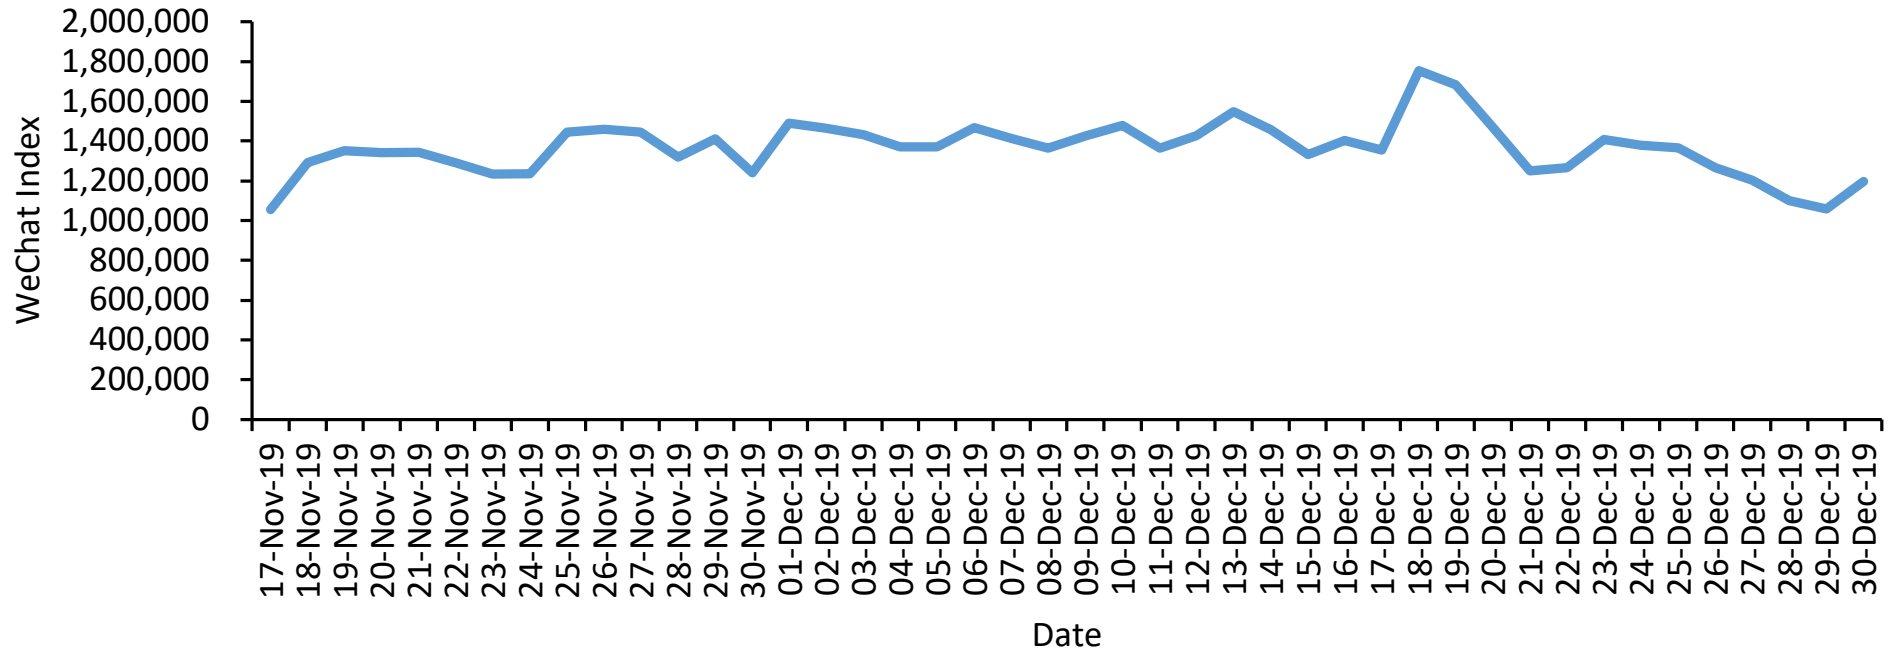

Supplement: Supplementary file [file 2020.02.24.20026682-2.pdf]
